## Withdrawal Statement

The authors have withdrawn their manuscript <https://www.medrxiv.org/content/10.1101/2023.08.30.23294877v1> owing to the fact that they have new data and they are currently preparing an updated version.

Therefore, the authors do not wish this work to be cited as reference for the project. If you have any questions, please contact the corresponding author of MS ID#: MEDRXIV/2023/294877

MS TITLE: Caries Lesion Assessment Using 3D Virtual Models By Examiners with Different Degrees of Clinical Experience

Authors: Ioana Porumb<sup>a,b#</sup>, Daniel Corneliu Leucuta<sup>c#</sup>, Marius Banut<sup>d</sup>, Bogdan Culic<sup>e</sup>, Ondine Patricia Lucaciu<sup>f</sup>, Carina Culic<sup>g\*</sup>, Meda-Romana Simu<sup>h\*</sup>, Iulia Clara Badea<sup>a</sup>, Alexa-Nicole Leghezeu<sup>i</sup>, Iulia Sandu<sup>d</sup>, Marion Nigoghossian<sup>i</sup>

<sup>a</sup> Department of Preventive Dentistry, Iuliu Hatieganu University of Medicine and Pharmacy, 31 A Iancu str, 400083 Cluj-Napoca, Romania; [ioana.chifor@umfcluj.ro](mailto:ioana.chifor@umfcluj.ro), [iulia.badea@umfcluj.ro](mailto:iulia.badea@umfcluj.ro)

<sup>b</sup> SC Chifor Meddent SRL, 9 Gh Doja str, 400 Cluj-Napoca, Romania, [ioana\\_chi@yahoo.com](mailto:ioana_chi@yahoo.com)

<sup>c</sup> Department of Medical Informatics and Biostatistics, Iuliu Hatieganu University of Medicine and Pharmacy, 4 Pasteur str, 400349 Cluj-Napoca, Romania, [dleucuta@umfcluj.ro](mailto:dleucuta@umfcluj.ro)

<sup>d</sup> Babes-Bolyai University, Faculty of Psychology and Educational Sciences, 7 Sindicatelor Street, Cluj-Napoca, Romania [marius.banut@ubbcluj.ro](mailto:marius.banut@ubbcluj.ro), [iulia.sandu@stud.ubbcluj.ro](mailto:iulia.sandu@stud.ubbcluj.ro).

<sup>e</sup> Dental Propedeutics and Aesthetics Department, Iuliu Hatieganu University of Medicine and Pharmacy, 32 Clinicilor str, 400006 Cluj-Napoca, Romania, [bculic@umfcluj.ro](mailto:bculic@umfcluj.ro)

<sup>f</sup> Department of Oral Health, Iuliu Hatieganu University of Medicine and Pharmacy, 15 Victor Babes str, 400012 Cluj-Napoca, Romania, [patricia.lucaciu@umfcluj.ro](mailto:patricia.lucaciu@umfcluj.ro)

<sup>g</sup> \* Department of Odontology, Iuliu Hatieganu University of Medicine and Pharmacy, 33 Mitorilor str, 400001 Cluj-Napoca, Romania, [carina.culic@umfcluj.ro](mailto:carina.culic@umfcluj.ro)

<sup>h</sup> \* Department of Pediatric Dentistry, Iuliu Hatieganu University of Medicine and Pharmacy, Cluj-Napoca, Romania; [romana.simu@elearn.umfcluj.ro](mailto:romana.simu@elearn.umfcluj.ro)

Faculty of Dental Medicine, Iuliu Hatieganu University of Medicine and Pharmacy, Cluj-Napoca, Romania, [marion.audr.nigoghossian@elearn.umfcluj.ro](mailto:marion.audr.nigoghossian@elearn.umfcluj.ro), [leghezeu.alexan.nicole@elearn.umfcluj.ro](mailto:leghezeu.alexan.nicole@elearn.umfcluj.ro)

Any questions could be addressed by email at: [ioana.chifor@umfcluj.ro](mailto:ioana.chifor@umfcluj.ro)

We apologize for any inconvenience this withdrawal request might have caused and we thank you in advance for your understanding.

Sincerely yours,

Dr Ioana Porumb (Chifor), Dr. Meda-Romana Simu

21.11.2023
